# Supplementary material for: Influence of the Lignin Content on the Properties of Poly(Lactic Acid)/lignin-Containing Cellulose Nanofibrils Composite Films
Source: PubMed Central journal article supplement (PMC6403545; doi:10.3390/polym10091013), 2018-09-11
Supplement: polymers-10-01013-s001.pdf [file polymers-10-01013-s001.pdf]

## Supplementary Information

### Influence of the lignin content on the properties of poly(lactic acid)/lignin-containing cellulose nanofibrils composite films

Xuan Wang <sup>1\*</sup>, Yuan Jia <sup>1</sup>, Zhen Liu<sup>1</sup> and Jiaojiao Miao <sup>2</sup>

<sup>1</sup> College of Chemical Engineering, Xi'an University, Xi'an 710065, PR China; jiayu\_an\_happy@126.com (Y.J); liuzhen.lz @163.com (Z.L)

<sup>2</sup> School of Life Sciences, Northwestern Polytechnical University, Xi'an 710072, PR China; mjj.smile@163.com

\* Correspondence: wangxuan201441@163.com; Tel.: +86 17791696569

#### Surface energy calculation

The theory of the contact angle of pure liquids on a solid responds to the widely applied Young's equation (Eq. S1):

$$\gamma_L \cos \theta = \gamma_S - \gamma_{SL} \quad (\text{S1})$$

where  $\gamma_L$  is the experimentally determined surface energy of the liquid,  $\theta$  is the contact angle,  $\gamma_S$  is the surface energy of the solid and  $\gamma_{SL}$  is the solid/liquid interfacial energy.

Surface energy values were calculated according to the acid-base theory, which also allowed to obtain the disperse, acid and base components. Acid-base theory introduces a combining rule that factors molecular consideration and theories of intermolecular forces and eliminates  $\gamma_{SL}$  from Young's equation. The total surface energy of a solid ( $\gamma_S$ ) is calculated from the sum of one disperse component, associated with polar component ( $\gamma_S^p$ ) and dispersion component ( $\gamma_S^d$ ) (Eq. S2).

$$\gamma_S = \gamma_S^p + \gamma_S^d \quad (\text{S2})$$

In addition, we derived the relations between polar component and dispersion component of liquids and solids (Eq. S3).

$$\gamma(1 + \cos \theta) = 2\sqrt{\gamma_S^d \gamma_L^d} + 2\sqrt{\gamma_S^p \gamma_L^p} \quad (\text{S3})$$

Where  $\gamma_L^p$  is the polar component of test liquids,  $\gamma_L^d$  is the dispersion component of test liquids. The  $\gamma_S^p$  and  $\gamma_S^d$  can be obtained by taking the  $\gamma_L^p$  and  $\gamma_L^d$  of each two test liquids in to equation S3.
